# Supplementary material for: Physical Activity in Community-Dwelling Older Adults: Which Real-World Accelerometry Measures Are Robust? A Systematic Review
Source: MDPI journal article supplement (doi:10.3390/s23177615), 2023-09-02
Supplement: s1 [file s1]

Table S1

MEDLINE/PsycINFO/Embase/CINAHL/AMED {Conducted on 18 January 2021}

1. Fitness Trackers/
2. Accelerometry/ or Actigraphy/
3. Wearable Electronic Devices/
4. (fitness tracker\* or acceleromet\* or actigraph\* or wearable\* or smartwatch\* or "smart watch\*" or "activity track\*" or step or pedomet\*).mp. [mp=title, abstract, original title, name of substance word, subject heading word, floating sub-heading word, keyword heading word, organism supplementary concept word, protocol supplementary concept word, rare disease supplementary concept word, unique identifier, synonyms]
5. 1 or 2 or 3 or 4
6. exercise/ or exp running/ or swimming/ or exp walking/
7. motor activity/ or freezing reaction, cataleptic/
8. (exercis\* or "motor activit\*" or "physical activit\*" or "habitual activit\*" or "ambulatory activit\*" or walk\* or gait\* or locomoti\*).mp. [mp=title, abstract, original title, name of substance word, subject heading word, floating sub-heading word, keyword heading word, organism supplementary concept word, protocol supplementary concept word, rare disease supplementary concept word, unique identifier, synonyms]
9. 6 or 7 or 8
10. exp aged/ or "aged, 80 and over"/
11. ("older adult\*" or "senior citizen\*" or "older people" or elderly).mp. [mp=title, abstract, original title, name of substance word, subject heading word, floating sub-heading word, keyword heading word, organism supplementary concept word, protocol supplementary concept word, rare disease supplementary concept word, unique identifier, synonyms]
12. 10 or 11
13. exp "reproducibility of results"/ or sample size/ or exp "sensitivity and specificity"/
14. ("reproducibility of result\*" or clinimetr\* or variabilit\* or reliab\* or valid\* or responsiveness or qualit\* or specificity or sensitivity).mp. [mp=title, abstract, original title, name of substance word, subject heading word, floating sub-heading word, keyword heading word, organism supplementary concept word, protocol supplementary concept word, rare disease supplementary concept word, unique identifier, synonyms]
15. 13 or 14
16. 5 and 9 and 12 and 15
17. limit 16 to (english language and humans and yr="2010 - 2021")

WOS:

TOPIC:

("fitness tracker\*" OR acceleromet\* OR actigraph\* OR wearable\* OR smartwatch\* OR "smart watch\*" OR "activity track\*" OR step OR pedomet\*)

Databases= WOS, CCC, DRCI, DIIDW, KJD, MEDLINE, RSCI, SCIELO Timespan=2010-2020

Search language= English

TOPIC:

(exercis\* OR "motor activit\*" OR "physical activit\*" OR "habitual activit\*" OR "ambulatory activit\*" OR walk\* OR gait\* OR locomoti\*)

Databases= WOS, CCC, DRCI, DIIDW, KJD, MEDLINE, RSCI, SCIELO Timespan=2010-2020

Search language= English

TOPIC:

("older adult\*" OR "senior citizen\*" OR "older people" OR elderly)

Databases= WOS, CCC, DRCI, DIIDW, KJD, MEDLINE, RSCI, SCIELO Timespan=2010-2020

Search language= English

TOPIC:

("reproducibility of result\*" OR clinimetr\* OR variabilit\* OR reliab\* OR valid\* OR responsiveness OR qualit\* OR specificity OR sensitivity)

Databases= WOS, CCC, DRCI, DIIDW, KJD, MEDLINE, RSCI, SCIELO Timespan=2010-2020

Search language=English

SCOPUS:

( TITLE-ABS-KEY ( ( "reproducibility of result\*" OR clinimetr\* OR variabilit\* OR reliab\* OR valid\* OR responsiveness OR qualit\* OR specificity OR sensitivity ) ) ) AND ( ( TITLE-ABS-KEY ( "fitness tracker\*" OR acceleromet\* OR actigraph\* OR wearable\* OR smartwatch\* OR "smart watch\*" OR "activity track\*" OR step OR pedomet\* ) ) AND ( TITLE-ABS-KEY ( ( exercis\* OR "motor activit\*" OR "physical activit\*" OR "habitual activit\*" OR "ambulatory activit\*" OR walk\* OR gait\* OR locomoti\* ) ) ) ) AND ( TITLE-ABS-KEY ( ( "older adult\*" OR "senior citizen\*" OR "older people" OR elderly ) ) ) ) AND ( PUBYEAR > 2009 ) AND ( LIMIT-TO ( LANGUAGE , "English" ) )

IEEE

((("fitness tracker" OR acceleromet\* OR actigraph OR actigraphy OR wearable OR smartwatch OR "smart watch" OR "activity tracker" OR step OR pedometer) AND (exercise OR "motor activit\*" OR "physical activit\*" OR "habitual activit\*" OR "ambulatory activit\*" OR walk OR gait OR locomotion) ))) AND (((("older adult" OR "senior citizen" OR "older people" OR elderly) AND ("reproducibility of result" OR "reproducibility of results" OR clinimetr\* OR variability OR reliab\* OR validity OR responsiveness OR quality OR specificity OR sensitivity)))  
[Date range: 2010 - 2021]

MEDLINE/PsycINFO/Embase/CINAHL/AMED {Conducted on 25 November 2022}

1. Fitness Trackers/
2. Accelerometry/ or Actigraphy/
3. Wearable Electronic Devices/

4. (fitness tracker\* or acceleromet\* or actigraph\* or wearable\* or smartwatch\* or "smart watch\*" or "activity track\*" or step or pedomet\*).mp. [mp=title, abstract, original title, name of substance word, subject heading word, floating sub-heading word, keyword heading word, organism supplementary concept word, protocol supplementary concept word, rare disease supplementary concept word, unique identifier, synonyms]
5. 1 or 2 or 3 or 4
6. exercise/ or exp running/ or swimming/ or exp walking/
7. motor activity/ or freezing reaction, cataleptic/
8. (exercis\* or "motor activit\*" or "physical activit\*" or "habitual activit\*" or "ambulatory activit\*" or walk\* or gait\* or locomoti\*).mp. [mp=title, abstract, original title, name of substance word, subject heading word, floating sub-heading word, keyword heading word, organism supplementary concept word, protocol supplementary concept word, rare disease supplementary concept word, unique identifier, synonyms]
9. 6 or 7 or 8
10. exp aged/ or "aged, 80 and over"/
11. ("older adult\*" or "senior citizen\*" or "older people" or elderly).mp. [mp=title, abstract, original title, name of substance word, subject heading word, floating sub-heading word, keyword heading word, organism supplementary concept word, protocol supplementary concept word, rare disease supplementary concept word, unique identifier, synonyms]
12. 10 or 11
13. exp "reproducibility of results"/ or sample size/ or exp "sensitivity and specificity"/
14. ("reproducibility of result\*" or clinimetr\* or variabilit\* or reliab\* or valid\* or responsiveness or qualit\* or specificity or sensitivity).mp. [mp=title, abstract, original title, name of substance word, subject heading word, floating sub-heading word, keyword heading word, organism supplementary concept word, protocol supplementary concept word, rare disease supplementary concept word, unique identifier, synonyms]
15. 13 or 14
16. 5 and 9 and 12 and 15
17. limit 16 to (english language and humans and yr="2020 - 2022")

WOS:

TOPIC:

("fitness tracker\*" OR acceleromet\* OR actigraph\* OR wearable\* OR smartwatch\* OR "smart watch\*" OR "activity track\*" OR step OR pedomet\*)

Databases= WOS, CCC, DRCI, DIIDW, KJD, MEDLINE, RSCI, SCIELO Timespan=2020-2022

Search language= English

TOPIC:

(exercis\* OR "motor activit\*" OR "physical activit\*" OR "habitual activit\*" OR "ambulatory activit\*" OR walk\* OR gait\* OR locomoti\*)

Databases= WOS, CCC, DRCI, DIIDW, KJD, MEDLINE, RSCI, SCIELO Timespan=2020-2022

Search language= English

TOPIC:

("older adult\*" OR "senior citizen\*" OR "older people" OR elderly)

Databases= WOS, CCC, DRCI, DIIDW, KJD, MEDLINE, RSCI, SCIELO Timespan=2020-2022

Search language= English

TOPIC:

("reproducibility of result\*" OR clinimetr\* OR variabilit\* OR reliab\* OR valid\* OR responsiveness OR qualit\* OR specificity OR sensitivity)

Databases= WOS, CCC, DRCI, DIIDW, KJD, MEDLINE, RSCI, SCIELO Timespan=2020-2022

Search language=English

SCOPUS:

( TITLE-ABS-KEY ( ( "reproducibility of result\*" OR clinimetr\* OR variabilit\* OR reliab\* OR valid\* OR responsiveness OR qualit\* OR specificity OR sensitivity ) ) ) AND ( ( TITLE-ABS-KEY ( "fitness tracker\*" OR acceleromet\* OR actigraph\* OR wearable\* OR smartwatch\* OR "smart watch\*" OR "activity track\*" OR step OR pedomet\* ) ) AND ( TITLE-ABS-KEY ( ( exercis\* OR "motor activit\*" OR "physical activit\*" OR "habitual activit\*" OR "ambulatory activit\*" OR walk\* OR gait\* OR locomoti\* ) ) ) AND ( TITLE-ABS-KEY ( ( "older adult\*" OR "senior citizen\*" OR "older people" OR elderly ) ) ) ) AND ( PUBYEAR > 2019 ) AND ( LIMIT-TO ( LANGUAGE , "English" ) )

IEEE

((("fitness tracker" OR acceleromet\* OR actigraph OR actigraphy OR wearable OR smartwatch OR "smart watch" OR "activity tracker" OR step OR pedometer) AND (exercise OR "motor activit\*" OR "physical activit\*" OR "habitual activit\*" OR "ambulatory activit\*" OR walk OR gait OR locomotion) ))) AND ((( "older adult" OR "senior citizen" OR "older people" OR elderly) AND ("reproducibility of result" OR "reproducibility of results" OR clinimetr\* OR variability OR reliab\* OR validity OR responsiveness OR quality OR specificity OR sensitivity)))

[Date range: 2020 - 2022]

**Supplementary Table S2.** Acceptability and adherence of tools/instruments of studies included in the systematic review

| Study                | Instrument type                                     | Placement of instrument                                                 | Length of wear                                                                                                                                                                                              | Sampling frequency (Hz)                                           | Justification for location of wear                                                                                                                    | Adherence Level                                                            |
|----------------------|-----------------------------------------------------|-------------------------------------------------------------------------|-------------------------------------------------------------------------------------------------------------------------------------------------------------------------------------------------------------|-------------------------------------------------------------------|-------------------------------------------------------------------------------------------------------------------------------------------------------|----------------------------------------------------------------------------|
| Awais et al. [1]     | tri-axial accelerometer, gyroscope and magnetometer | Chest, L5 and thigh (uSense); non-dominant wrist (Shimmer3)             | Approximately 100 minutes                                                                                                                                                                                   | 100                                                               | ND                                                                                                                                                    | ND                                                                         |
| Brand et al. [2]     | tri-axial accelerometer                             | Wrist                                                                   | Up to 10 days                                                                                                                                                                                               | 25 (Garmin), 100 (AX3)                                            | Wrist-worn sensors are widely used in research studies and clinical trials to quantify movement.                                                      | ND                                                                         |
| Briggs et al. [3]    | tri-axial accelerometer                             | Garmin and ActiGraph – nondominant wrist<br>ActiGraph – nondominant hip | Minimum of 48 hours                                                                                                                                                                                         | 30 (ActiGraph), ND (Garmin)                                       | Wrist-worn consumer accelerometry devices are more popular now.                                                                                       | ND                                                                         |
| Burton et al. [4]    | tri-axial accelerometer                             | Wrist                                                                   | 14 days                                                                                                                                                                                                     | GENEactiv recorded movement in 30hz and collapsed into 60s epochs | ND                                                                                                                                                    | 16 of the 30 fitness trackers for 14-day collection had some missing data. |
| Chigateri et al. [5] | tri-axial accelerometer                             | Lower back (L5)                                                         | Scripted tasks –<br>Duration of scripted tasks. walking time (s) (20.3 ± 6.9), non-walking time (80.0 ± 25.1)<br>Unscripted tasks –<br>walking time (s) (115.4 ± 89.7), non-walking time (s) (500.4 ± 96.1) |                                                                   | Wearable sensors placed on the waist provide highest accuracy in predicting human body movements since they are closest to the body's centre of mass. | ND                                                                         |

\* ND – not described.

**Supplementary Table S2.** Acceptability and adherence of tools/instruments of studies included in the systematic review – continued

| Study               | Instrument type                                       | Placement of instrument                                                                                                                                          | Length of wear                                                                                                                                              | Sampling frequency (Hz)                                                   | Justification for location of wear                             | Adherence Level                                                                                                                                                                                                                                                                                                                                                                                                                                            |
|---------------------|-------------------------------------------------------|------------------------------------------------------------------------------------------------------------------------------------------------------------------|-------------------------------------------------------------------------------------------------------------------------------------------------------------|---------------------------------------------------------------------------|----------------------------------------------------------------|------------------------------------------------------------------------------------------------------------------------------------------------------------------------------------------------------------------------------------------------------------------------------------------------------------------------------------------------------------------------------------------------------------------------------------------------------------|
| Dijkstra et al. [6] | tri-axial accelerometer                               | lower back                                                                                                                                                       | 30 minutes                                                                                                                                                  | 100                                                                       | ND                                                             | ND                                                                                                                                                                                                                                                                                                                                                                                                                                                         |
| Farina et al. [7]   | tri-axial accelerometer                               | Fitbit Charge HR – dominant wrist<br>Misfit Shine – dominant wrist and waist<br>ActiGraph GT3X+ – dominant waist<br>NL2000i – above midpoint of dominant kneecap | 7 days                                                                                                                                                      | ActiGraph recorded in 10s epochs, Fitbit Charge HR recorded in 60s epochs | ND                                                             | Device wear time (min/day): 843 ± 65. Nine participants had missing data from at least 1 activity monitor due to loss of device, error in set up and device repositioning. Four participants had evidence of at least one day of non-wear ActiGraph data, and 7 had at least one day of ActiGraph data less than 10 hrs. Three participants were excluded as they had less than 4 days valid ActiGraph data.                                               |
| Geraedts et al. [8] | 3D-MEMS accelerometer with barometric pressure sensor | Around the neck (worn as a necklace)                                                                                                                             | Standardized movement protocol: for the period the duration of the standardized activities<br>Free movement protocol: 30 minutes<br>User evaluation: 7 days | Accelerometry data – 50; Barometric data – 25                             | "Least" intrusive to the user; more suitable for daily wearing | Participants wore the sensor over 1 week and provided feedback on comfort, weight, size and usability via questionnaire – scored between 1 and 5 (1 meaning "Do not agree at all" and 5 meaning "Completely agree"). The average score on the user evaluation questionnaire was 4.4 (SD ± 0.6; range 2.4–5.0) on a scale of 1 to 5.<br>All participants wore the sensor during daytime hours of all requested days, 16 (i.e., 80%) wore it while sleeping. |

\* ND – not described.



**Supplementary Table S2.** Acceptability and adherence of tools/instruments of studies included in the systematic review - continued

| Study               | Instrument type                                                              | Placement of instrument                                                                                              | Length of wear                                                                                     | Sampling frequency (Hz)                                                                            | Justification for location of wear                                                          | Adherence Level                                                                                                                                                                   |
|---------------------|------------------------------------------------------------------------------|----------------------------------------------------------------------------------------------------------------------|----------------------------------------------------------------------------------------------------|----------------------------------------------------------------------------------------------------|---------------------------------------------------------------------------------------------|-----------------------------------------------------------------------------------------------------------------------------------------------------------------------------------|
| Kastelic et al. [9] | tri-axial accelerometer                                                      | Polar Vantage M (wrist);<br>Garmin Vivoactive 4s (wrist);<br>Garmin Vivosport (wrist);<br>ActiGraph wGT3X-BT (waist) | Group baseline protocol – 6 days;<br>Group extended protocol – 12 days (each wearable over 4 days) | ActiGraph GT3X+ – 30;<br>Polar Vantage M (ND); Garmin Vivoactive 4s (ND);<br>Garmin Vivosport (ND) | ND                                                                                          | The wear time compliance with the Polar Vantage M, Garmin Vivoactive 4s and Garmin Vivosport was as high as 24.0 ± 0.1 h/day, 23.9 ± 0.5 h/day and 23.9 ± 0.5 h/day, respectively |
| Paul et al. [10]    | tri-axial accelerometer                                                      | Right hip                                                                                                            | 7 days                                                                                             | ActiGraph GT3X+ – 30                                                                               | ND                                                                                          | ND                                                                                                                                                                                |
| Soltani et al. [11] | tri-axial accelerometer                                                      | GENEactiv Original (wrist);<br>ActiGraph GT9X (shank)                                                                | Around 12 hours (within one day)                                                                   | GENEactiv Original – 40 ,ActiGraph GT9X – 50                                                       | It offers comfort, high usability and discreet monitoring thus, increasing user compliance. | ND                                                                                                                                                                                |
| Taylor et al. [12]  | tri-axial accelerometer                                                      | Lower back                                                                                                           | Scripted – 4 to 6 minutes.<br>Unscripted – 5 to 9 minutes                                          | 100                                                                                                | ND                                                                                          | ND                                                                                                                                                                                |
| Yamada et al. [13]  | Actimarker – tri-axial accelerometer;<br>Lifecorder – uniaxial accelerometer | Back of the waist                                                                                                    | 14 days                                                                                            | ND                                                                                                 | ND                                                                                          | ND                                                                                                                                                                                |

\* ND – not described.

1. Awais, M.; Chiari, L.; Ihlen, E.A.; Helbostad, J.L.; Palmerini, L. Classical machine learning versus deep learning for the older adults free-living activity classification. *Sensors* **2021**, *21*, 4669.
2. Brand, Y.E.; Schwartz, D.; Gazit, E.; Buchman, A.S.; Gilad-Bachrach, R.; Hausdorff, J.M. Gait Detection from a Wrist-Worn Sensor Using Machine Learning Methods: A Daily Living Study in Older Adults and People with Parkinson's Disease. *Sensors* **2022**, *22*, 7094.
3. Briggs, B.C.; Hall, K.S.; Jain, C.; Macrea, M.; Morey, M.C.; Oursler, K.K. Assessing Moderate to Vigorous Physical Activity in Older Adults: Validity of a Commercial Activity Tracker. *Frontiers in Sports and Active Living* **2022**, *3*, 766317.
4. Burton, E.; Hill, K.D.; Lautenschlager, N.T.; Thogersen-Ntoumani, C.; Lewin, G.; Boyle, E.; Howie, E. Reliability and validity of two fitness tracker devices in the laboratory and home environment for older community-dwelling people. *BMC Geriatr* **2018**, *18*, 103, doi:10.1186/s12877-018-0793-4.
5. Chigateri, N.G.; Kerse, N.; Wheeler, L.; MacDonald, B.; Klenk, J. Validation of an accelerometer for measurement of activity in frail older people. *Gait Posture* **2018**, *66*, 114-117, doi:10.1016/j.gaitpost.2018.08.024.

6. Dijkstra, B.; Kamsma, Y.; Zijlstra, W. Detection of gait and postures using a miniaturised triaxial accelerometer-based system: accuracy in community-dwelling older adults. *Age and ageing* **2010**, *39*, 259-262.
7. Farina, N.; Lowry, R.G. The Validity of Consumer-Level Activity Monitors in Healthy Older Adults in Free-Living Conditions. *J Aging Phys Act* **2018**, *26*, 128-135, doi:10.1123/japa.2016-0344.
8. Geraedts, H.A.; Zijlstra, W.; Van Keeken, H.G.; Zhang, W.; Stevens, M. Validation and User Evaluation of a Sensor-Based Method for Detecting Mobility-Related Activities in Older Adults. *PLoS One* **2015**, *10*, e0137668, doi:10.1371/journal.pone.0137668.
9. Kastelic, K.; Dobnik, M.; Löfler, S.; Hofer, C.; Šarabon, N. Validity, reliability and sensitivity to change of three consumer-grade activity trackers in controlled and free-living conditions among older adults. *Sensors* **2021**, *21*, 6245.
10. Paul, S.S.; Tiedemann, A.; Hassett, L.M.; Ramsay, E.; Kirkham, C.; Chagpar, S.; Sherrington, C. Validity of the Fitbit activity tracker for measuring steps in community-dwelling older adults. *BMJ Open Sport Exerc Med* **2015**, *1*, e000013, doi:10.1136/bmjsem-2015-000013.
11. Soltani, A.; Paraschiv-Ionescu, A.; Dejnabadi, H.; Marques-Vidal, P.; Aminian, K. Real-world gait bout detection using a wrist sensor: An unsupervised real-life validation. *Ieee Access* **2020**, *8*, 102883-102896.
12. Taylor, L.M.; Klenk, J.; Maney, A.J.; Kerse, N.; MacDonald, B.M.; Maddison, R. Validation of a body-worn accelerometer to measure activity patterns in octogenarians. *Archives of physical medicine and rehabilitation* **2014**, *95*, 930-934.
13. Yamada, Y.; Hashii-Arishima, Y.; Yokoyama, K.; Itoi, A.; Adachi, T.; Kimura, M. Validity of a triaxial accelerometer and simplified physical activity record in older adults aged 64-96 years: a doubly labeled water study. *Eur J Appl Physiol* **2018**, *118*, 2133-2146, doi:10.1007/s00421-018-3944-6.
